# Supplementary material
Source: publisher figshare collection journal article supplement (https://sage.figshare.com/ndownloader/files/17905241)
Supplement: Supplementary file 1 [file 17905241]

**Supplemental Digital Appendix 2. Univariate cumulative logistic regression models to assess effect of domain completeness and number of previous NIs on the directional change in response between pre- and post- assessment questions (outcome).**

| Question                                                                                                                                                                    | Predictor                        | p-value       |
|-----------------------------------------------------------------------------------------------------------------------------------------------------------------------------|----------------------------------|---------------|
| 1. To what extent does your institution gather and disseminate data on race, ethnicity and language preference of the population you serve?                                 | Number of previous NIs           | 0.3169        |
|                                                                                                                                                                             | Pre-work/Background              | 0.8105        |
|                                                                                                                                                                             | Measurement                      | 0.1850        |
|                                                                                                                                                                             | Methods                          | <b>0.0211</b> |
|                                                                                                                                                                             | Implement-Measure-Adjust-Sustain | 0.3912        |
| 2. How proficient is your institution at engaging residents in the use of data as research tool to reduce health care disparities?                                          | Number of previous NIs           | 0.3751        |
|                                                                                                                                                                             | Pre-work/Background              | 0.8985        |
|                                                                                                                                                                             | Measurement                      | 0.8640        |
|                                                                                                                                                                             | Methods                          | 0.3299        |
|                                                                                                                                                                             | Implement-Measure-Adjust-Sustain | 0.1663        |
| 3. How proficient is your institution at engaging residents in community research regarding health care disparities as a scholarly activity?                                | Number of previous NIs           | <b>0.0346</b> |
|                                                                                                                                                                             | Pre-work/Background              | 0.9768        |
|                                                                                                                                                                             | Measurement                      | 0.7344        |
|                                                                                                                                                                             | Methods                          | 0.3972        |
|                                                                                                                                                                             | Implement-Measure-Adjust-Sustain | 0.0762        |
| 4. To what extent do your residents receive cultural competency education on identifying and reducing health care disparities relevant to the patient population you serve? | Number of previous NIs           | 0.1797        |
|                                                                                                                                                                             | Pre-work/Background              | 0.3997        |
|                                                                                                                                                                             | Measurement                      | 0.2383        |
|                                                                                                                                                                             | Methods                          | 0.3470        |
|                                                                                                                                                                             | Implement-Measure-Adjust-Sustain | 0.1891        |
| 5. To what extent do your residents understand principles of cultural competency and delivery of linguistically appropriate services?                                       | Number of previous NIs           | 0.0646        |
|                                                                                                                                                                             | Pre-work/Background              | 0.7896        |
|                                                                                                                                                                             | Measurement                      | 0.1017        |
|                                                                                                                                                                             | Methods                          | <b>0.0443</b> |
|                                                                                                                                                                             | Implement-Measure-Adjust-Sustain | 0.2574        |
| 6. At what level is your average resident trained and given the opportunity to understand the community health needs of the population you serve?                           | Number of previous NIs           | 0.5793        |
|                                                                                                                                                                             | Pre-work/Background              | 0.7728        |
|                                                                                                                                                                             | Measurement                      | 0.2152        |
|                                                                                                                                                                             | Methods                          | 0.0699        |
|                                                                                                                                                                             | Implement-Measure-Adjust-Sustain | -             |
| 7. To what extent do your residents and faculty members know your institution's priorities for addressing health care disparities?                                          | Number of previous NIs           | 0.5512        |
|                                                                                                                                                                             | Pre-work/Background              | 0.3871        |
|                                                                                                                                                                             | Measurement                      | 0.5485        |
|                                                                                                                                                                             | Methods                          | 0.1018        |
|                                                                                                                                                                             | Implement-Measure-Adjust-Sustain | 0.1742        |
| 8. How active are your residents in participating in community health improvement strategies?                                                                               | Number of previous NIs           | 0.3059        |
|                                                                                                                                                                             | Pre-work/Background              | 0.3172        |
|                                                                                                                                                                             | Measurement                      | 0.8939        |
|                                                                                                                                                                             | Methods                          | 0.9270        |
|                                                                                                                                                                             | Implement-Measure-Adjust-Sustain | 0.4443        |
| 9. How active is your institution in engaging the various communities it serves in health improvement?                                                                      | Number of previous NIs           | 0.8057        |
|                                                                                                                                                                             | Pre-work/Background              | 0.2119        |
|                                                                                                                                                                             | Measurement                      | 0.3534        |
|                                                                                                                                                                             | Methods                          | 0.4805        |
|                                                                                                                                                                             | Implement-Measure-Adjust-Sustain | 0.6816        |
| <b>Readiness</b><br>Check one, regarding your institution's overall readiness [or current state of activities] in Community and Health Disparities.                         | Number of previous NIs           | 0.1285        |
|                                                                                                                                                                             | Pre-work/Background              | 0.7259        |
|                                                                                                                                                                             | Measurement                      | 0.5423        |
|                                                                                                                                                                             | Methods                          | 0.9494        |
|                                                                                                                                                                             | Implement-Measure-Adjust-Sustain | 0.7303        |
